# Supplementary material
Source: HighWire-hosted journal article supplement (https://gut.bmj.com/content/67/9/1652)
Supplement: inline-supplementary-material-6 [file inline-supplementary-material-6.pdf]

|       |        |      |                            |            |              |            |      |              |        |      |                        |           |              |            |      |              |        |       |                            |                     |              |            |              |              |      |
|-------|--------|------|----------------------------|------------|--------------|------------|------|--------------|--------|------|------------------------|-----------|--------------|------------|------|--------------|--------|-------|----------------------------|---------------------|--------------|------------|--------------|--------------|------|
| IPP41 | KRAS   | 1011 | Chr12:25398284 C>A         | p.G12V     | Substitution | Missense   | 20.8 | Not detected | KRAS   | 353  | Chr12:25398284 C>A     | p.G12V    | Substitution | Missense   | 20.3 | Not detected | N/A    |       |                            |                     |              |            |              |              |      |
| IPP42 | KRAS   | 1634 | Chr12:25398284 C>A         | p.G12V     | Substitution | Missense   | 20.4 | N/A          | KRAS   | 1065 | Chr12:25398284 C>A     | p.G12V    | Substitution | Missense   | 62.6 | N/A          | N/A    |       |                            |                     |              |            |              |              |      |
|       | KRAS   | 349  | Chr12:25398284 C>T         | p.G12D     | Substitution | Missense   | 11.9 |              | KRAS   | 1731 | Chr12:25398284 C>A     | p.G12V    | Substitution | Missense   | 56.3 |              | KRAS   | 1378  | Chr12:25398284 C>A         | p.G12V              | Substitution | Missense   | 15.4         |              |      |
|       | GNAS   | 350  | Chr20:57484420 C>T         | p.R201C    | Substitution | Missense   | 15.4 |              |        |      |                        |           |              |            |      |              |        | 272   |                            |                     |              |            |              |              |      |
| IPP43 | PIK3CA | 125  | Chr3:178951955 A>G         | p.M1004V   | Substitution | Missense   | 5.4  | Not detected |        |      |                        |           |              |            |      |              |        | 51    |                            |                     |              |            | Not detected |              |      |
|       |        | 141  |                            |            |              |            |      |              | TP53   | 442  | Chr17:7578263 G>A      | p.R196X   | Substitution | Missense   | 85.9 | Not detected |        | 414   |                            |                     |              |            |              |              |      |
|       |        | 360  |                            |            |              |            |      |              | SMAD4  | 109  | Chr18:48573625 delAATG | p.K70fs   | Deletion     | Frameshift | 7    |              |        | 186   |                            |                     |              |            |              |              |      |
| IPP44 | KRAS   | 593  | Chr12:25380275 T>G         | p.Q61H     | Substitution | Missense   | 24.7 | ARID1A (D)   | KRAS   | 1650 | Chr12:25380275 T>G     | p.Q61H    | Substitution | Missense   | 37.8 | Not detected | KRAS   | 1754  | Chr12:25380275 T>G         | p.Q61H              | Substitution | Missense   | 35.5         | Not detected |      |
|       | RNF43  | 167  | Chr17:56435571 C>T         | p.M522I    | Substitution | Missense   | 5.9  | RNF43 (D)    |        |      |                        |           |              |            |      |              |        | 838   |                            |                     |              |            |              |              |      |
|       | RNF43  | 166  | Chr17:56435629 C>T         | p.S503I    | Substitution | Missense   | 5.6  | SMAD4 (D)    |        |      |                        |           |              |            |      |              |        | 836   |                            |                     |              |            |              |              |      |
| IPP45 | KRAS   | 841  | Chr12:25398284 C>T         | p.G12D     | Substitution | Missense   | 26.4 | Not detected | KRAS   | 604  | Chr12:25398284 C>T     | p.G12D    | Substitution | Missense   | 21.1 | Not detected |        |       |                            |                     |              |            |              | N/A          |      |
|       | SMAD4  | 1214 | Chr18:48575209 C>T         | p.R135X    | Substitution | Nonsense   | 36.3 |              | SMAD4  | 1439 | Chr18:48575209         | p.R135X   | Substitution | Nonsense   | 19.8 | Not detected |        |       |                            |                     |              |            |              |              |      |
| IPP46 | KRAS   | 1545 | Chr12:25398284 C>T         | p.G12D     | Substitution | Missense   | 6.7  |              | KRAS   | 960  | Chr12:25398284 C>T     | p.G12D    | Substitution | Missense   | 24.9 |              | KRAS   | 1635  | Chr12:25398284 C>A         | p.G12V              | Substitution | Missense   | 21.1         |              |      |
|       | TP53   | 604  | Chr17:7577539 G>A          | p.R248W    | Substitution | Missense   | 14   |              | KRAS   | 960  | Chr12:25398284 C>G     | p.G12R    | Substitution | Missense   | 7.6  |              | KRAS   | 2134  | Chr12:25380275 T>G         | p.Q61H              | Substitution | Missense   | 13.5         |              |      |
|       | RNF43  | 111  | Chr17:56435399 G>A         | p.P580S    | Substitution | Missense   | 5.9  | Not detected | TP53   | 705  | Chr17:7577539 G>A      | p.R248W   | Substitution | Missense   | 17.4 | Not detected |        |       |                            |                     |              |            |              | Not detected |      |
|       |        | 766  |                            |            |              |            |      |              |        |      |                        |           |              |            |      |              |        | 525   |                            |                     |              |            |              |              |      |
|       |        | 113  |                            |            |              |            |      |              | GNAS   | 984  | Chr20:57484420 C>T     | p.R201C   | Substitution | Missense   | 7.2  |              |        |       |                            |                     |              |            |              |              | 10.5 |
|       |        |      |                            |            |              |            |      |              |        | 179  |                        |           |              |            |      |              |        | RNF43 | 169                        | Chr17:56438296 delG | p.Q233fs     | Deletion   | Frameshift   | 10.5         |      |
| IPP47 | KRAS   | 2813 | Chr12:25398284 C>T         | p.G12D     | Substitution | Missense   | 42.2 | ARID1A (D)   | KRAS   | 2759 | Chr12:25398284 C>T     | p.G12D    | Substitution | Missense   | 45.8 | ARID1A (D)   |        |       |                            |                     |              |            |              |              | N/A  |
|       | TGFBR2 | 288  | Chr3:30732969 C>T          | p.R553C    | Substitution | Missense   | 64.6 | TGFBR2 (D)   | TGFBR2 | 305  | Chr3:30732969 C>T      | p.R553C   | Substitution | Missense   | 61   | TGFBR2 (D)   |        |       |                            |                     |              |            |              |              | N/A  |
|       | TP53   | 658  | Chr17:7578484 delGAA       | p.S149del  | Deletion     | In-Frame   | 54.3 | SMAD4 (D)    | TP53   | 532  | Chr17:7578484 delGAA   | p.S149del | Deletion     | In-Frame   | 63.9 | SMAD4 (D)    |        |       |                            |                     |              |            |              |              |      |
|       |        |      |                            |            |              |            |      | MAP2K4 (D)   |        |      |                        |           |              |            |      |              |        |       |                            |                     |              |            |              |              |      |
| IPP48 | KRAS   | 1737 | Chr12:25398284 C>T         | p.G12D     | Substitution | Missense   | 18.2 | Not detected | KRAS   | 2550 | Chr12:25398284 C>T     | p.G12D    | Substitution | Missense   | 18.2 | Not detected | KRAS   | 3637  | Chr12:25398284 C>A         | p.G12V              | Substitution | Missense   | 30.9         | Not detected |      |
|       |        | 1737 |                            |            |              |            |      |              | KRAS   | 2550 | Chr12:25398284 C>T     | p.G12V    | Substitution | Missense   | 8.1  | Not detected |        |       |                            |                     |              |            |              |              |      |
|       |        | 1856 |                            |            |              |            |      |              | GNAS   | 775  | Chr20:57484420 C>T     | p.R201C   | Substitution | Missense   | 13.9 | Not detected | GNAS   | 1007  | Chr20:57484420 C>T         | p.R201C             | Substitution | Missense   | 16.1         | Not detected |      |
|       |        | 178  |                            |            |              |            |      |              | RNF43  | 209  | Chr17:56438206 delCT   | p.S262fs  | Deletion     | Frameshift | 8.4  |              |        |       |                            |                     |              |            |              |              |      |
| IPP49 | KRAS   | 750  | Chr12:25398285 C>G         | p.G12R     | Substitution | Missense   | 48   | Not detected | KRAS   | 448  | Chr12:25398285 C>G     | p.G12R    | Substitution | Missense   | 17.4 | Not detected | KRAS   | 491   | Chr12:25398285 C>G         | p.G12R              | Substitution | Missense   | 13.3         | Not detected |      |
|       | CDKN2A | 418  | Chr9:21971169delCAGCAGCTCC | p.R58_L63d | Deletion     | In-Frame   | 50.2 | Not detected |        | 448  |                        |           |              |            |      |              | KRAS   | 491   | Chr12:25398284 C>T         | p.G12D              | Substitution | Missense   | 16           | Not detected |      |
|       | TP53   | 773  | Chr17:7577539 G>A          | p.R248W    | Substitution | Missense   | 46.2 |              |        | 185  |                        |           |              |            |      |              | CDKN2A | 272   | Chr9:21971169delCAGCAGCTCC | p.R58_L63d          | Deletion     | In-Frame   | 16.3         | Not detected |      |
| IPP50 | KRAS   | 5367 | Chr12:25398285 C>G         | p.G12R     | Substitution | Missense   | 5.5  | Not detected | KRAS   | 1557 | Chr12:25398284 C>A     | p.G12V    | Substitution | Missense   | 23.4 | Not detected | KRAS   | 999   | Chr12:25398284 C>A         | p.G12V              | Substitution | Missense   | 58.3         | Not detected |      |
|       | KRAS   | 5367 | Chr12:25380282 G>A         | p.A59V     | Substitution | Missense   | 10.1 | Not detected |        | 1557 |                        |           |              |            |      |              |        |       |                            |                     |              |            |              |              |      |
|       | TP53   | 138  | Chr17:7578263 A>G          | p.R196X    | Substitution | Nonsense   | 77   | Not detected | TP53   | 672  | Chr17:7578263 A>G      | p.R196X   | Substitution | Nonsense   | 29.6 | Not detected | TP53   | 323   | Chr17:7578263 A>G          | p.R196X             | Substitution | Nonsense   | 80.4         | Not detected |      |
|       | RNF43  | 301  | Chr17:56440953 C>T         | p.M128I    | Substitution | Missense   | 7.8  |              |        | 2540 |                        |           |              |            |      |              |        |       |                            |                     |              |            |              |              |      |
| IPP51 | KRAS   | 2267 | Chr12:25398284 C>A         | p.G12V     | Substitution | Missense   | 22.5 | TP53 (D)     | KRAS   | 2934 | Chr12:25398284 C>A     | p.G12V    | Substitution | Missense   | 35.6 | TP53 (D)     |        |       |                            |                     |              |            |              |              | N/A  |
| IPP52 | KRAS   | 2019 | Chr12:25398284 C>A         | p.G12V     | Substitution | Missense   | 26.2 | Not detected | KRAS   | 2061 | Chr12:25398284 C>A     | p.G12V    | Substitution | Missense   | 44.9 | Not detected | KRAS   | 2050  | Chr12:25398284 C>A         | p.G12V              | Substitution | Missense   | 23.8         | Not detected |      |
|       | SMAD4  | 1011 | Chr18:48593406 G>T         | p.G386V    | Substitution | Missense   | 38.3 |              |        | 219  |                        |           |              |            |      |              |        |       |                            |                     |              |            |              |              |      |
|       |        | 2739 |                            |            |              |            |      |              | KRAS   | 574  | Chr12:25398284 C>G     | p.G12A    | Substitution | Missense   | 7.7  |              |        |       |                            |                     |              |            |              |              |      |
| IPP53 | KRAS   | 1645 | Chr12:25380275 T>A         | p.Q61H     | Substitution | Missense   | 11.7 | Not detected |        | 558  |                        |           |              |            |      |              |        |       |                            |                     |              |            |              |              |      |
|       | GNAS   | 573  | Chr20:57484421 G>A         | p.R201H    | Substitution | Missense   | 10.4 |              |        | 102  |                        |           |              |            |      |              |        |       |                            |                     |              |            |              |              | N/A  |
|       | CDKN2A | 220  | Chr9:21971145 G>C          | p.N71K     | Substitution | Missense   | 15.4 |              |        | 115  |                        |           |              |            |      |              |        |       |                            |                     |              |            |              |              |      |
|       | TP53   | 376  | Chr17:7577568 C>T          | p.C238Y    | Substitution | Missense   | 13.1 |              |        | 295  |                        |           |              |            |      |              |        |       |                            |                     |              |            |              |              |      |
| IPP54 | KRAS   | 2932 | Chr12:25398284 C>A         | p.G12V     | Substitution | Missense   | 9.9  | Not detected | KRAS   | 1102 | Chr12:25398284 C>G     | p.G12A    | Substitution | Missense   | 9.9  | MAP2K4 (D)   | KRAS   | 988   | Chr12:25398284 C>T         | p.G12D              | Substitution | Missense   | 28.7         | MAP2K4 (D)   |      |
|       | TP53   | 1336 | Chr17:7577124 C>A          | p.V272L    | Substitution | Missense   | 9.5  |              |        | 528  |                        |           |              |            |      |              | TP53   | 467   | Chr17:7572940 delG         | p.P390fs            | Deletion     | Frameshift | 15           | TP53 (D)     |      |
| IPP55 | KRAS   | 1435 | Chr12:25398284 C>T         | p.G12D     | Substitution | Missense   | 31.1 | N/A          | KRAS   | 4105 | Chr12:25398284 C>T     | p.G12D    | Substitution | Missense   | 41.7 | N/A          | KRAS   | 1687  | Chr12:25398284 C>T         | p.G12D              | Substitution | Missense   | 35.9         | N/A          |      |
| IPP56 | KRAS   | 4710 | Chr12:25398284 C>A         | p.G12V     | Substitution | Missense   | 5.6  | Not detected | KRAS   | 1833 | Chr12:25398284 C>A     | p.G12V    | Substitution | Missense   | 38.2 | Not detected | KRAS   | 1990  | Chr12:25398284 C>A         | p.G12V              | Substitution | Missense   | 34.1         | Not detected |      |
|       | TP53   | 382  | Chr17:7578453 delGG        | p.A159fs   | Deletion     | Frameshift | 9    | Not detected | TP53   | 377  | Chr17:7578453 delGG    | p.A159fs  | Deletion     | Frameshift | 65.4 | Not detected | TP53   | 554   | Chr17:7578453 delGG        | p.A159fs            | Deletion     | Frameshift | 75.1         | RNF43 (D)    |      |
|       |        | 80   |                            |            |              |            |      |              | RNF43  | 230  | Chr17:56435773 C>T     | p.S455N   | Substitution | Missense   | 6.3  |              |        |       |                            |                     |              |            |              |              |      |
| IPC01 | KRAS   | 1234 | Chr12:25380275 T>A         | p.Q61H     | Substitution | Missense   | 12.1 |              | KRAS   | 5097 | Chr12:25380275 T>A     | p.Q61H    | Substitution | Missense   | 47.1 |              | KRAS   | 5650  | Chr12:25380275 T>A         | p.Q61H              | Substitution | Missense   | 39.4         |              |      |
|       | KRAS   | 1234 | Chr12:25380276 T>A         | p.Q61L     | Substitution | Missense   | 12.3 |              | KRAS   | 5097 | Chr12:25380276 T>A     | p.Q61L    | Substitution | Missense   | 47.2 |              | KRAS   | 5650  | Chr12:25380276 T>A         | p.Q61L              | Substitution | Missense   | 39.8         |              |      |
|       | GNAS   | 248  | Chr20:57484456 C>T         | p.Q214X    | Substitution | Nonsense   | 13.3 | KRAS (A)     |        | 1496 |                        |           |              |            |      |              |        |       |                            |                     |              |            |              | ARID1A (D)   |      |
|       | TP53   | 214  | Chr17:7573973 C>T          | p.D352N    | Substitution | Missense   | 13.9 |              |        | 2022 |                        |           |              |            |      |              |        |       |                            |                     |              |            |              | TP53 (D)     |      |
|       | SMAD4  | 298  | Chr18:48591871 G>A         | p.C345Y    | Substitution | Missense   | 10.5 |              |        | 3840 |                        |           |              |            |      |              |        |       |                            |                     |              |            |              |              |      |
|       |        | 117  |                            |            |              |            |      |              | RNF43  | 331  | Chr17:56435663 C>T     | p.G492S   | Substitution | Missense   | 10.5 |              |        |       |                            |                     |              |            |              |              |      |
| IPC02 | GNAS   | 1720 | Chr20:57484427 T>C         | p.L204P    | Substitution | Missense   | 9.5  | N/A          |        |      |                        |           |              |            |      |              | KRAS   | 2109  | Chr12:25380285 G>A         | p.T58I              | Substitution | Missense   | 42.9         |              |      |
|       | TP53   | 922  | Chr17:7577538 C>T          | p.R248Q    | Substitution | Missense   | 12.5 |              |        |      |                        |           |              |            |      |              | GNAS   | 465   | Chr20:57484427 T>C         | p.L204P             | Substitution | Missense   | 37.6         | RNF43 (D)    |      |
|       | RNF43  | 428  | Chr17:56435561 C>T         | p.V526M    | Substitution | Missense   | 10.8 |              |        |      |                        |           |              |            |      |              |        |       |                            |                     |              |            |              |              |      |
|       | ARID1A | 515  | Chr1:27087554 C>T          | p.R710C    | Substitution | Missense   | 10.1 |              |        |      |                        |           |              |            |      |              |        |       |                            |                     |              |            |              |              |      |
| IPC03 | KRAS   | 713  | Chr12:25398284 C>T         | p.G12D     | Substitution | Missense   | 15.5 | Not detected | KRAS   | 254  | Chr12:25398284 C>T     | p.G12D    | Substitution | Missense   | 33.3 | Not detected |        |       |                            |                     |              |            |              |              | N/A  |
|       | GNAS   | 1247 | Chr20:57484420 C>T         | p.R201C    | Substitution | Missense   | 51.4 |              | GNAS   | 284  | Chr20:57484420 C>T     | p.R201C   | Substitution | Missense   |      |              |        |       |                            |                     |              |            |              |              |      |

|        |        |      |                    |          |              |            |      |                       |           |        |                     |                    |              |              |              |              |      |                    |                    |              |                |          |                         |              |      |  |  |  |  |  |  |  |  |  |
|--------|--------|------|--------------------|----------|--------------|------------|------|-----------------------|-----------|--------|---------------------|--------------------|--------------|--------------|--------------|--------------|------|--------------------|--------------------|--------------|----------------|----------|-------------------------|--------------|------|--|--|--|--|--|--|--|--|--|
| IPCO4  | KRAS   | 868  | Chr12:25398285 C>G | p.G12R   | Substitution | Missense   | 5    | TP53 (D)<br>SMAD4 (D) | KRAS      | 1520   | Chr12:25398285 C>G  | p.G12R             | Substitution | Missense     | 52.3         | Not detected | N/A  |                    |                    |              |                |          |                         |              |      |  |  |  |  |  |  |  |  |  |
|        |        | 868  |                    |          |              |            |      |                       | KRAS      | 1520   | Chr12:25398285 C>A  | p.G12C             | Substitution | Missense     | 13.1         |              |      |                    |                    |              |                |          |                         |              |      |  |  |  |  |  |  |  |  |  |
|        | RNF43  | 293  | Chr17:56439945 G>T | p.S216X  | Substitution | Nonsense   | 11   | RNF43 (D)             | RNF43     | 584    | Chr17:56439945 G>T  | p.S216X            | Substitution | Nonsense     | 74.1         |              |      |                    |                    |              |                |          |                         |              |      |  |  |  |  |  |  |  |  |  |
| IPCO5  | GNAS   | 1096 | Chr20:57484420 C>T | p.R201C  | Substitution | Missense   | 6.3  | RNF43 (D)             | GNAS      | 439    | Chr20:57484420 C>T  | p.R201C            | Substitution | Missense     | 42.6         | Not detected | GNAS | 1022               | Chr20:57484420 C>T | p.R201C      | Substitution   | Missense | 7.8                     | Not detected |      |  |  |  |  |  |  |  |  |  |
|        |        | 1086 |                    |          |              |            |      |                       | RNF43     | 741    | Chr17:56435026 G>A  | p.P704L            | Substitution | Missense     | 10.9         |              |      |                    |                    |              |                |          |                         |              |      |  |  |  |  |  |  |  |  |  |
| IPCO6  | GNAS   | 1009 | Chr20:57484420 C>T | p.R201C  | Substitution | Missense   | 14.2 | N/A                   | GNAS      | 1756   | Chr20:57484420 C>T  | p.R201C            | Substitution | Missense     | 61.4         | Not detected | GNAS | 1756               | Chr20:57484420 C>T | p.R201C      | Substitution   | Missense | 40.7                    | Not detected |      |  |  |  |  |  |  |  |  |  |
|        | TP53   | 243  | Chr17:7578271 T>C  | p.H193R  | Substitution | Missense   | 18.9 |                       | TP53      | 310    | Chr17:7578271 T>C   | p.H193R            | Substitution | Missense     | 48.2         |              |      |                    |                    |              |                |          |                         |              |      |  |  |  |  |  |  |  |  |  |
| IPCO7  | GNAS   | 684  | Chr20:57484421 G>A | p.R201H  | Substitution | Missense   | 10.4 | Not detected          | GNAS      | 1681   | Chr20:57484421 G>A  | p.R201H            | Substitution | Missense     | 65.2         | Not detected | N/A  |                    |                    |              |                |          |                         |              |      |  |  |  |  |  |  |  |  |  |
|        |        |      |                    |          |              |            |      |                       |           |        |                     |                    |              |              |              |              |      |                    |                    |              |                |          |                         |              |      |  |  |  |  |  |  |  |  |  |
| IPCO8  | GNAS   | 1188 | Chr20:57484420 C>T | p.R201C  | Substitution | Missense   | 61.2 | RNF43 (D)             | GNAS      | 1087   | Chr20:57484420 C>T  | p.R201C            | Substitution | Missense     | 34.9         | N/A          | N/A  |                    |                    |              |                |          |                         |              |      |  |  |  |  |  |  |  |  |  |
|        |        | 463  |                    |          |              |            |      |                       | TP53      | 284    | Chr17:7577538 C>T   | p.R248Q            | Substitution | Nonsense     | 16.8         |              |      |                    |                    |              |                |          |                         |              |      |  |  |  |  |  |  |  |  |  |
|        |        | 1077 |                    |          |              |            |      |                       | TP53      | 1294   | Chr17:7578388 C>T   | p.R181H            | Substitution | Nonsense     | 11.5         |              |      |                    |                    |              |                |          |                         |              |      |  |  |  |  |  |  |  |  |  |
|        |        | 2182 |                    |          |              |            |      |                       | RNF43     | 3929   | Chr17:56440943 G>A  | p.R132X            | Substitution | Nonsense     | 13.5         |              |      |                    |                    |              |                |          |                         |              |      |  |  |  |  |  |  |  |  |  |
| IPCO9  | GNAS   | 967  | Chr20:57484420 C>T | p.R201C  | Substitution | Missense   | 11.1 | TGFB2 (D)             | GNAS      | 557    | Chr20:57484420 C>T  | p.R201C            | Substitution | Missense     | 41.8         | N/A          | GNAS | 247                | Chr20:57484420 C>T | p.R201C      | Substitution   | Missense | 53.7                    | Not detected |      |  |  |  |  |  |  |  |  |  |
|        |        | 293  |                    |          |              |            |      |                       | ARID1A    | 144    | Chr1:27100974 C>T   | p.A1419V           | Substitution | Missense     | 12.1         |              |      |                    |                    |              |                |          |                         |              |      |  |  |  |  |  |  |  |  |  |
|        |        | 188  |                    |          |              |            |      |                       | RNF43     | 117    | Chr17:56438238 C>T  | p.C252Y            | Substitution | Missense     | 13           |              |      |                    |                    |              |                |          |                         |              |      |  |  |  |  |  |  |  |  |  |
| IPCO10 | GNAS   | 613  | Chr20:57484420 C>T | p.R201C  | Substitution | Missense   | 14.1 | PIK3CA (D)            | GNAS      | 783    | Chr20:57484420 C>T  | p.R201C            | Substitution | Missense     | 68.8         | Not detected | GNAS | 247                | Chr20:57484420 C>T | p.R201C      | Substitution   | Missense | 53.7                    | Not detected |      |  |  |  |  |  |  |  |  |  |
|        |        | 50   |                    |          |              |            |      |                       | RNF43     | 938    | Chr12:25398284 C>T  | p.G12D             | Substitution | Missense     | 40.1         |              |      |                    |                    |              |                |          |                         |              |      |  |  |  |  |  |  |  |  |  |
|        |        | 43   |                    |          |              |            |      |                       | RNF43     | 600    | Chr17:56492754 insT | p.N62fs            | Substitution | Frameshift   | 14.6         |              |      |                    |                    |              |                |          |                         |              |      |  |  |  |  |  |  |  |  |  |
|        |        | 928  |                    |          |              |            |      |                       |           |        |                     |                    |              |              |              |              |      |                    |                    |              |                |          |                         |              |      |  |  |  |  |  |  |  |  |  |
|        |        | 238  | Chr20:57484420 C>T | p.R201C  | Substitution | Missense   | 24.4 |                       | SMAD4 (D) | GNAS   | 223                 | Chr20:57484420 C>T | p.R201C      | Substitution | Missense     |              |      |                    |                    |              |                |          |                         |              | 52.5 |  |  |  |  |  |  |  |  |  |
| IPCO11 | TP53   | 375  | Chr17:7578509 A>C  | p.C141G  | Substitution | Missense   | 31.9 | SMAD4 (D)             | TP53      | 255    | Chr17:7578509 A>C   | p.C141G            | Substitution | Missense     | 44.5         | Not detected | GNAS | 314                | Chr20:57484420 C>T | p.R201C      | Substitution   | Missense | 46.6                    | Not detected |      |  |  |  |  |  |  |  |  |  |
|        |        |      |                    |          |              |            |      |                       |           |        |                     |                    |              |              |              |              |      |                    |                    |              |                |          |                         |              |      |  |  |  |  |  |  |  |  |  |
| IPCO12 | KRAS   | 962  | Chr12:25398285 C>T | p.G12S   | Substitution | Missense   | 6    | Not detected          | KRAS      | 3436   | Chr12:25398285 C>T  | p.G12S             | Substitution | Missense     | 58.5         | Not detected | KRAS | 3012               | Chr12:25398285 C>T | p.G12S       | Substitution   | Missense | 55.7                    | Not detected |      |  |  |  |  |  |  |  |  |  |
|        | TP53   | 464  | Chr17:7578257 C>A  | p.E198X  | Substitution | Nonsense   | 7.6  |                       | TP53      | 1553   | Chr17:7578257 C>A   | p.E198X            | Substitution | Nonsense     | 90.1         |              |      |                    |                    |              |                |          |                         |              |      |  |  |  |  |  |  |  |  |  |
| IPCO13 | GNAS   | 634  | Chr20:57484420 C>T | p.R201C  | Substitution | Missense   | 48.6 | Not detected          | GNAS      | 821    | Chr20:57484420 C>T  | p.R201C            | Substitution | Missense     | 43.3         | Not detected | GNAS | 4316               | Chr20:57484420 C>T | p.R201C      | Substitution   | Missense | 46.5                    | Not detected |      |  |  |  |  |  |  |  |  |  |
|        |        |      |                    |          |              |            |      |                       |           |        |                     |                    |              |              |              |              |      |                    |                    |              |                |          |                         |              |      |  |  |  |  |  |  |  |  |  |
| IPA01  | KRAS   | 2125 | Chr12:25398284 C>T | p.G12D   | Substitution | Missense   | 13.7 | SMAD4 (D)             |           | 1368   |                     |                    |              |              |              | SMAD4        | N/A  |                    |                    |              |                |          |                         |              |      |  |  |  |  |  |  |  |  |  |
|        | TP53   | 331  | Chr17:7577539 G>A  | p.R248W  | Substitution | Missense   | 17   |                       |           | 42     |                     |                    |              |              |              |              |      |                    |                    |              |                |          |                         |              |      |  |  |  |  |  |  |  |  |  |
|        |        | 2993 |                    |          |              |            |      |                       |           | KRAS   | 851                 | Chr12:2538028 G>A  | p.T58I       | Substitution | Missense     |              |      | 13.7               |                    |              |                |          |                         |              |      |  |  |  |  |  |  |  |  |  |
|        |        | 900  |                    |          |              |            |      |                       |           | TP53   | 242                 | Chr17:7579313 G>A  | p.T125M      | Substitution | Missense     |              |      | 17.1               |                    |              |                |          |                         |              |      |  |  |  |  |  |  |  |  |  |
|        |        | 64   |                    |          |              |            |      |                       |           | RNF43  | 228                 | Chr17:56437593 C>G | p.C290S      | Substitution | Missense     |              |      | 27.2               |                    |              |                |          |                         |              |      |  |  |  |  |  |  |  |  |  |
| IPA02  | SMAD4  | 245  | Chr18:48604667 C>T | p.R497C  | Substitution | Missense   | 27.2 | SMAD4 (D)             |           | 72     |                     |                    |              |              | Not          | N/A          |      |                    |                    |              |                |          |                         |              |      |  |  |  |  |  |  |  |  |  |
|        |        | 218  |                    |          |              |            |      |                       | RNF43     | 225    | Chr17:56435612 C>T  | p.V509M            | Substitution | Missense     |              |              | 17.9 |                    |                    |              |                |          |                         |              |      |  |  |  |  |  |  |  |  |  |
| IPA03  |        | 83   |                    |          |              |            |      |                       |           | 191    |                     |                    |              |              | Not detected | GNAS         | 272  | Chr20:57484479 G>A | c.G1018A           | Substitution | Splice variant | 10.1     | Not detected            |              |      |  |  |  |  |  |  |  |  |  |
|        |        | 2348 |                    |          |              |            |      |                       | KRAS      | 2801   | Chr12:25398285 C>G  | p.G12R             | Substitution | Missense     |              |              |      |                    |                    |              |                |          |                         | 11.9         |      |  |  |  |  |  |  |  |  |  |
|        | TGFB2  | 218  | Chr3:30713408 G>A  | p.E270K  | Substitution | Missense   | 5.3  |                       | GNAS      | 456    | Chr20:57484420 C>T  | p.R201C            | Substitution | Missense     |              |              |      |                    |                    |              |                |          |                         | 5.8          |      |  |  |  |  |  |  |  |  |  |
| IPA04  | KRAS   | 624  | Chr12:25398284 C>T | p.G12D   | Substitution | Missense   | 18.9 | Not detected          |           |        |                     |                    |              |              | N/A          | KRAS         | 329  | Chr12:25398284 C>T | p.G12D             | Substitution | Missense       | 33.2     | PIK3CA (D)<br>SMAD4 (D) |              |      |  |  |  |  |  |  |  |  |  |
|        | ARID1A | 136  | Chr1:27057895 C>T  | p.P535S  | Substitution | Missense   | 9.2  |                       |           |        |                     |                    |              |              |              |              |      |                    |                    |              |                |          |                         |              |      |  |  |  |  |  |  |  |  |  |
|        | PIK3CA | 796  | Chr3:178936082 G>A | p.E542K  | Substitution | Missense   | 9.3  |                       |           |        |                     |                    |              |              |              |              |      |                    |                    |              |                |          |                         |              |      |  |  |  |  |  |  |  |  |  |
| IPA05  | KRAS   | 953  | Chr12:25398285 C>G | p.G12D   | Substitution | Missense   | 20.9 | N/A                   | KRAS      | 543    | Chr12:25398284 C>T  | p.G12D             | Substitution | Missense     | 17.8         | N/A          | N/A  |                    |                    |              |                |          |                         |              |      |  |  |  |  |  |  |  |  |  |
|        | SMAD4  | 265  | Chr18:48586257 C>T | p.A309V  | Substitution | Missense   | 14.9 |                       |           | 301    |                     |                    |              |              |              |              |      |                    |                    |              |                |          |                         |              |      |  |  |  |  |  |  |  |  |  |
| IPA06  | KRAS   | 2007 | Chr12:25398284 C>T | p.G12D   | Substitution | Missense   | 25.6 | TGFB2 (D)             | KRAS      | 942    | Chr12:25398285 C>G  | p.G12R             | Substitution | Missense     | 16.6         | Not detected | KRAS | 131                | Chr12:25398284 C>T | p.G12D       | Substitution   | Missense | 23.5                    | Not detected |      |  |  |  |  |  |  |  |  |  |
|        |        | 678  |                    |          |              |            |      |                       | KRAS      | 1134   | Chr12:25380275 T>A  | p.Q61H             | Substitution | Missense     | 32.9         |              |      |                    |                    |              |                |          |                         |              |      |  |  |  |  |  |  |  |  |  |
|        |        | 2856 |                    |          |              |            |      |                       |           | 470    |                     |                    |              |              |              |              |      |                    |                    |              |                |          |                         |              |      |  |  |  |  |  |  |  |  |  |
|        | CDKN2A | 260  | Chr9:21971054 insC | p.A102fs | Insertion    | Frameshift | 16.7 |                       |           | 146    |                     |                    |              |              |              |              |      |                    |                    |              |                |          |                         |              |      |  |  |  |  |  |  |  |  |  |
| IPA07  | KRAS   | 2128 | Chr12:25398285 C>G | p.G12D   | Substitution | Missense   | 72.4 | N/A                   | KRAS      | 2949   | Chr12:25398284 C>A  | p.G12V             | Substitution | Missense     | 23.7         | Not detected | GNAS | 539                | Chr12:25380275 C>A | p.Q61H       | Substitution   | Missense | 17.2                    | RNF43 (D)    |      |  |  |  |  |  |  |  |  |  |
|        |        | 2288 |                    |          |              |            |      |                       |           | 1040   |                     |                    |              |              |              |              |      |                    |                    |              |                |          |                         |              |      |  |  |  |  |  |  |  |  |  |
|        |        | 1279 |                    |          |              |            |      |                       |           | 390    |                     |                    |              |              |              |              |      |                    |                    |              |                |          |                         |              |      |  |  |  |  |  |  |  |  |  |
|        |        | 668  |                    |          |              |            |      |                       |           | GNAS   | 360                 | Chr20:57480490 C>T | p.C163Y      | Substitution | Missense     |              |      |                    |                    |              |                |          |                         |              | 5.5  |  |  |  |  |  |  |  |  |  |
|        |        | 197  |                    |          |              |            |      |                       |           | CDKN2A | 153                 | Chr9:21971026 insC | p.G11fs      | Insertion    | Frameshift   |              |      |                    |                    |              |                |          |                         |              | 11.9 |  |  |  |  |  |  |  |  |  |

Mutated genes were annotated using the Consensus Coding DNA Sequences (CCDS) and RefSeq adj-/dist-IPMN - adjacent/distant IPMN

Bold indicates shared mutation to either of the other neoplasms

N/A - Sample not available

SNV - Single nucleotide variation

CNV - Copy number variation - A= Amplification; D=Deletion

VAF - Variant allele frequency
