# Supplementary material
Source: HighWire-hosted journal article supplement (https://gut.bmj.com/content/67/9/1652)
Supplement: inline-supplementary-material-7 [file inline-supplementary-material-7.pdf]

A

**KRAS hotspot cancer (PDAC)**

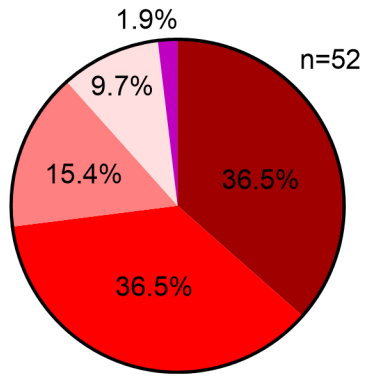

**KRAS hotspot IPMN (PDAC)**

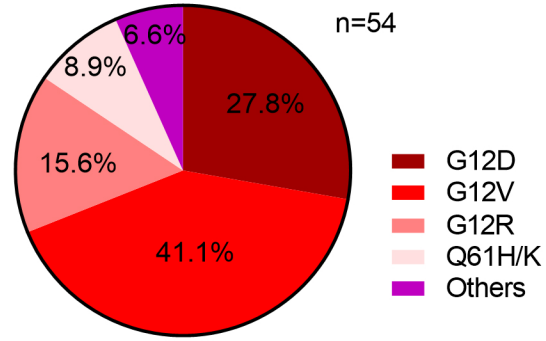

- G12D
- G12V
- G12R
- Q61H/K
- Others

B

**GNAS hotspot cancer (PDAC)**

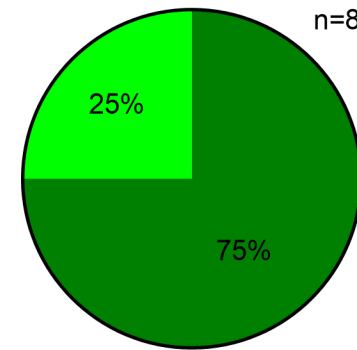

**GNAS hotspot IPMN (PDAC)**

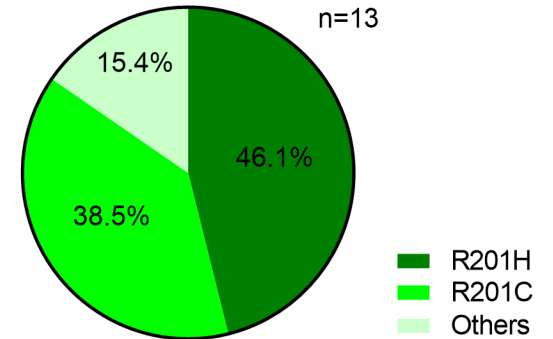

- R201H
- R201C
- Others

**KRAS hotspot cancer (Colloids)**

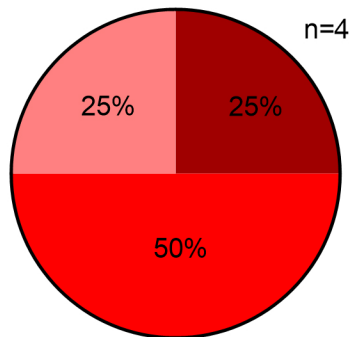

**KRAS hotspot IPMN (Colloids)**

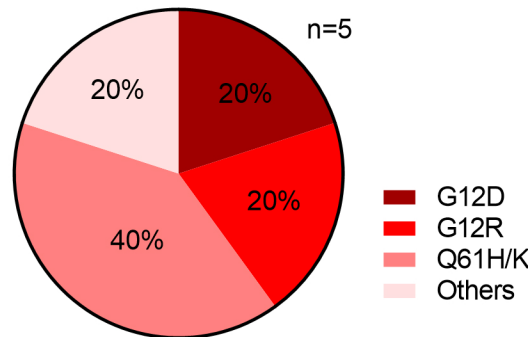

- G12D
- G12V
- G12R
- Q61H/K
- Others

**GNAS hotspot cancer (Colloids)**

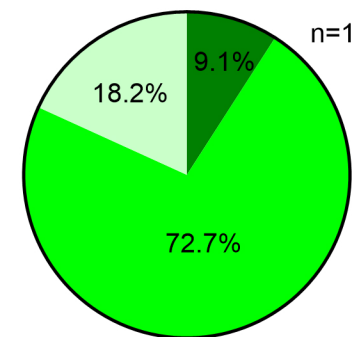

**GNAS hotspot IPMN (Colloids)**

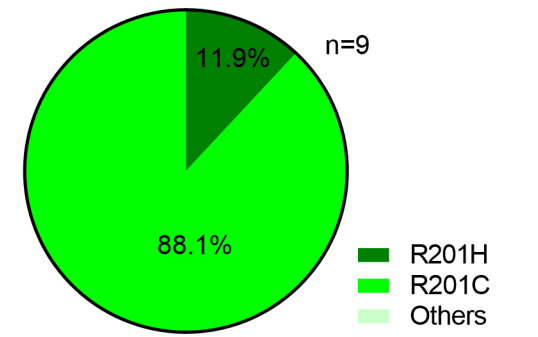

- R201H
- R201C
- Others
