# Supplementary material
Source: HighWire-hosted journal article supplement (https://gut.bmj.com/content/67/9/1652)

A

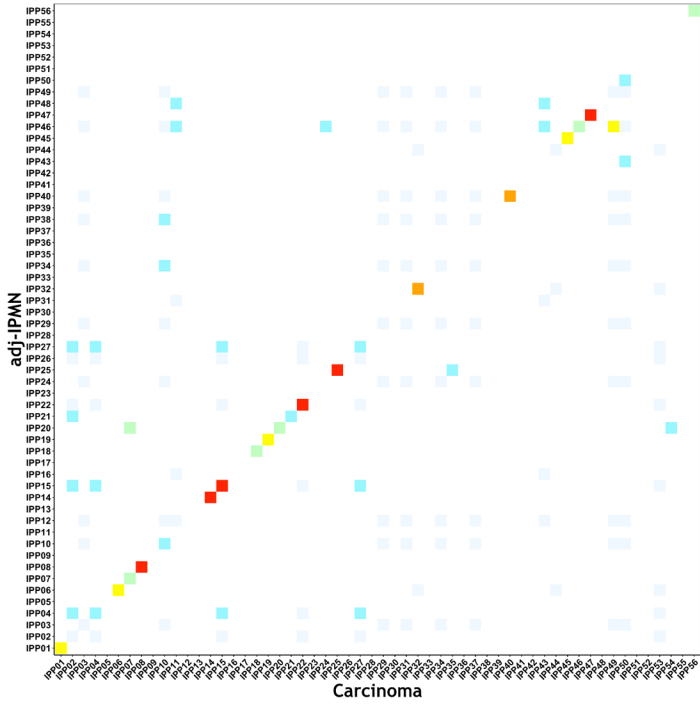

B

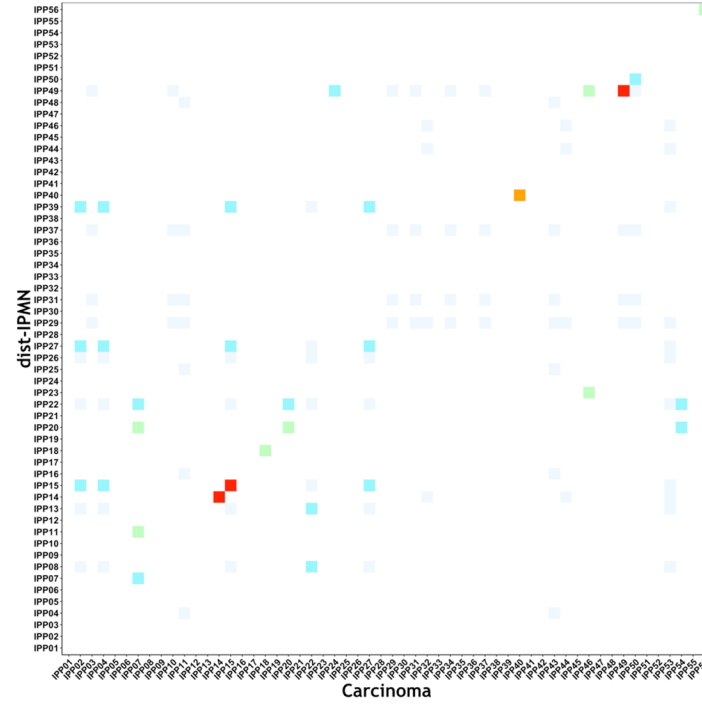

C

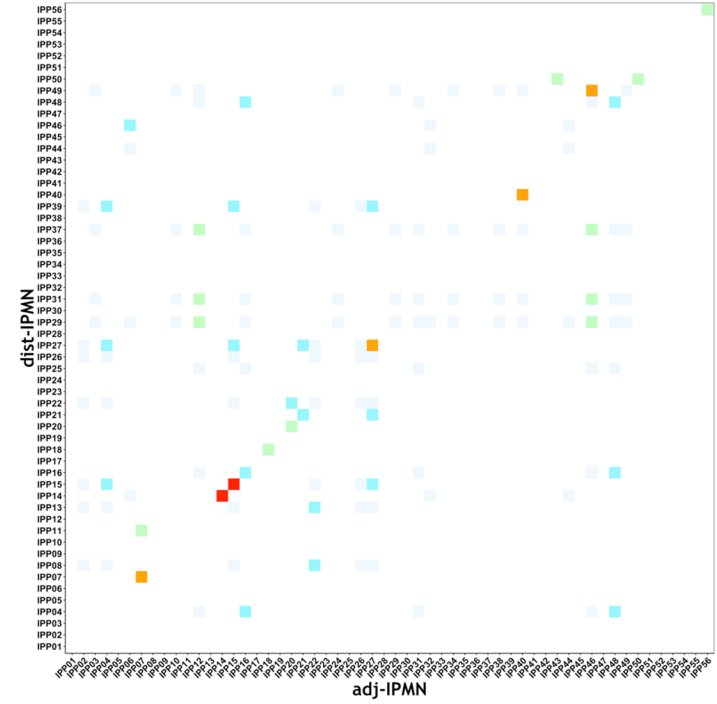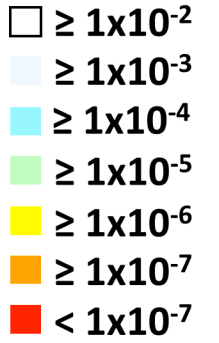

Supplement: inline-supplementary-material-10 [file inline-supplementary-material-10.pdf]

**IPP34**

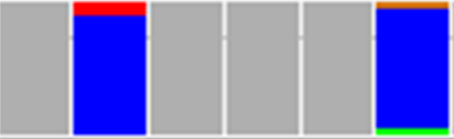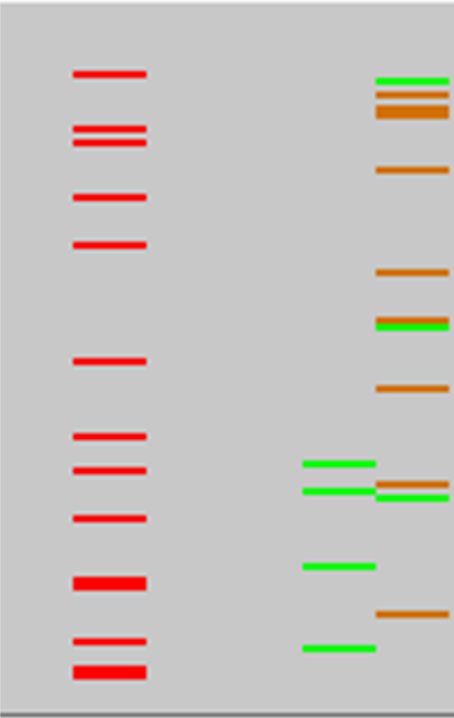

**G C C A C C**

**G G**

G13D G12V G12R  
(G12C)  
*KRAS*

Supplement: inline-supplementary-material-16 [file inline-supplementary-material-16.pdf]

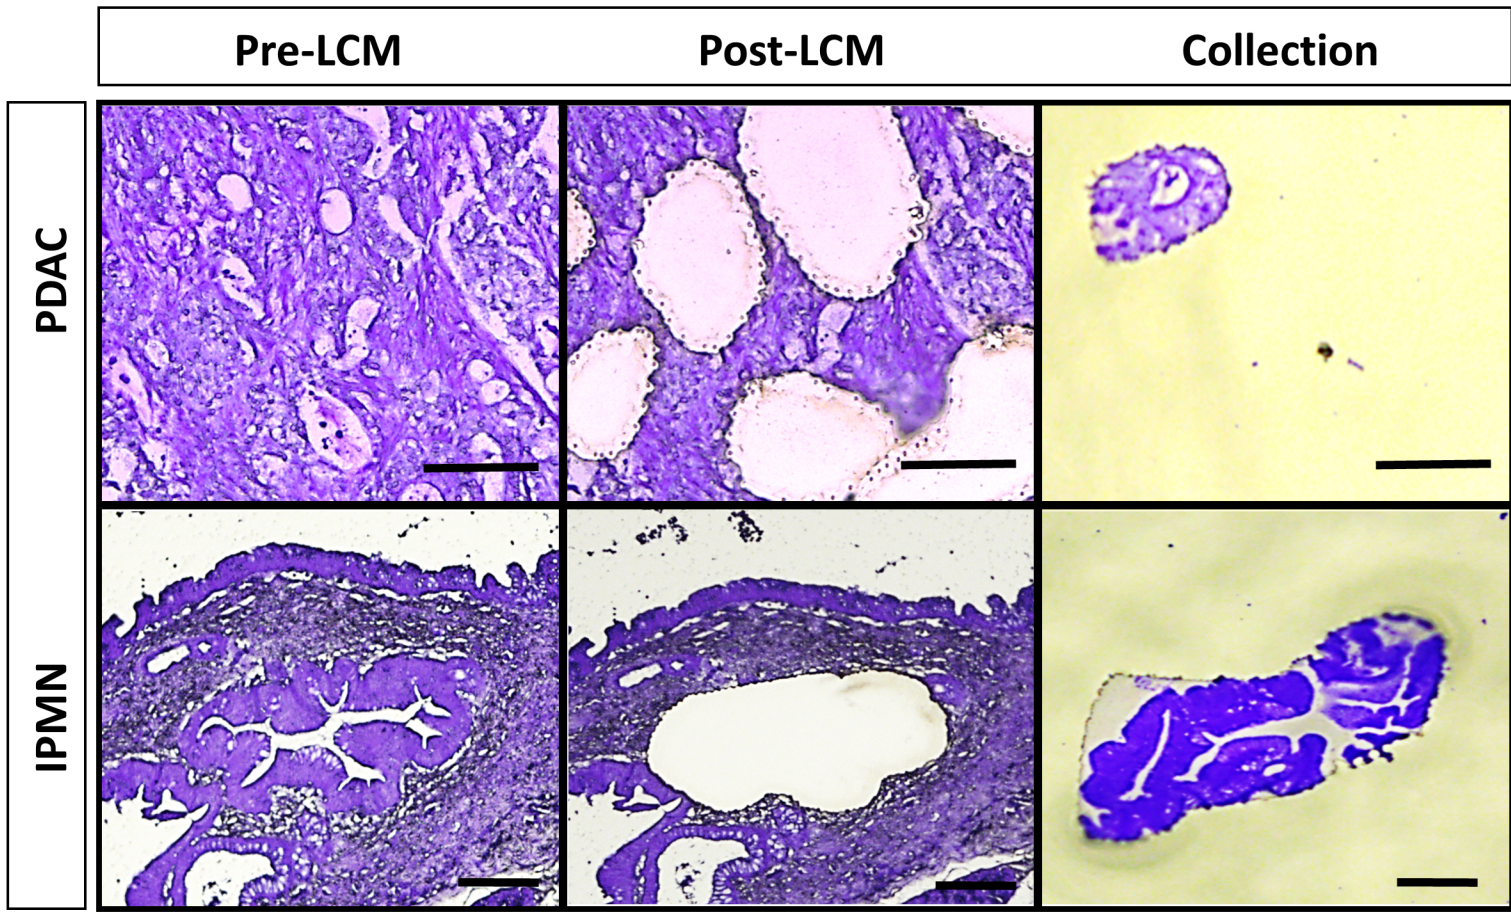

Supplement: inline-supplementary-material-3 [file inline-supplementary-material-3.pdf]

A

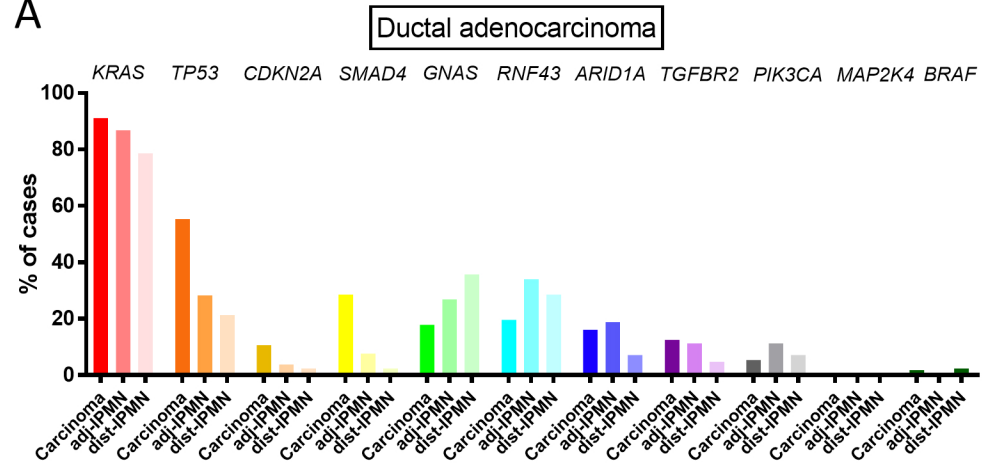

B

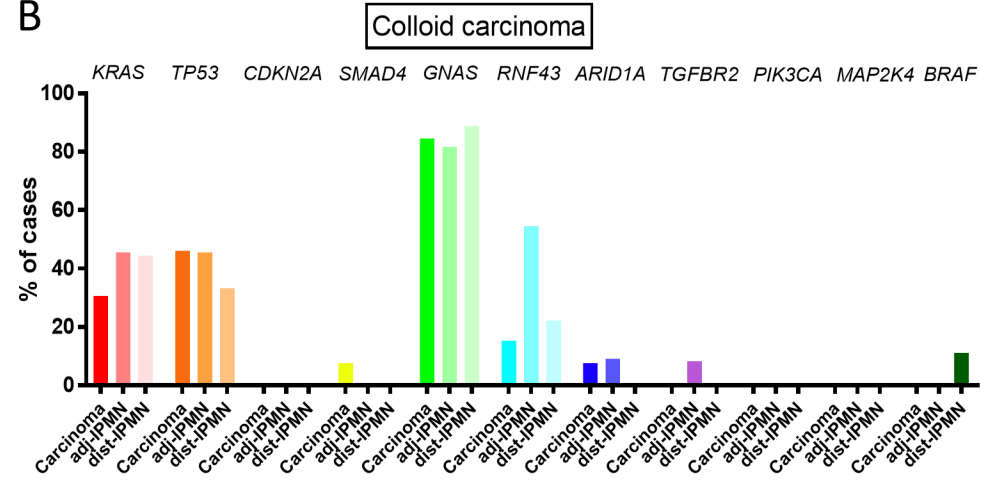

C

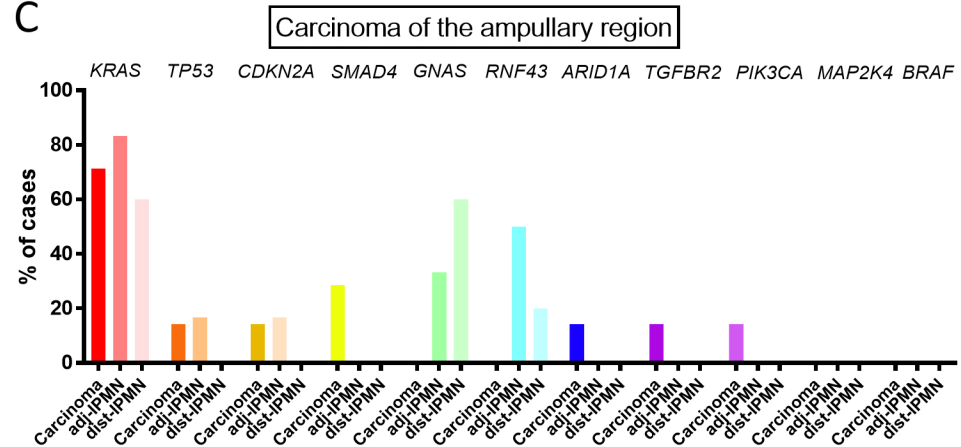

Supplement: inline-supplementary-material-5 [file inline-supplementary-material-5.pdf]
